# Supplementary material for: Exploring the Quality of Narrative Feedback Provided to Residents During Ambulatory Patient Care in Medicine and Surgery
Source: PubMed Central journal article supplement — J Med Educ Curric Dev. 2023 May 16;10:23821205231175734. doi: 10.1177/23821205231175734 (PMC10192660; doi:10.1177/23821205231175734), 2023-05-16
Supplement: sj-pdf-2-mde-10.1177_23821205231175734.pdf [file sj-pdf-2-mde-10.1177_23821205231175734.pdf]

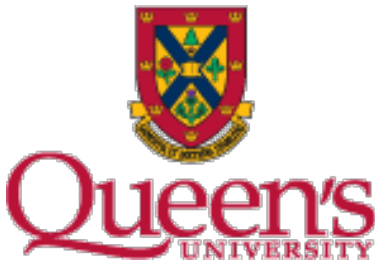

# C1: Providing surgical consultation

## C1: Providing surgical consultation

This EPA focuses on providing a General Surgery consult for any patient and presentation, including establishing the goals of care and deciding whether or not to operate.

This EPA includes obtaining an appropriate history and physical exam, and developing and communicating a comprehensive management plan, including for patients with complex clinical problems.

Patients with complex clinical problems are defined as those with multiple conditions that co-exist and/or interact, a single condition with multi-systemic manifestation, an atypical presentation of a common condition, and/or management challenges due to social determinants of health and/or cultural complexities.

This EPA may include the decision to move to a palliative approach to care and the provision of end-of-life care.

Assessor's Role

-- Please Select --

Basis of Assessment

-- Please Select --

Clinical Setting

-- Please Select --

Clinical Presentation

-- Please Select --

Case Complexity

-- Please Select --

Case Type

-- Please Select --

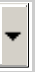

## Milestones

|                                                                                                                                   | Not Observed | Needs attention | Developing | Achieved |
|-----------------------------------------------------------------------------------------------------------------------------------|--------------|-----------------|------------|----------|
| Perform a clinical assessment that addresses all relevant issues                                                                  |              |                 |            |          |
| Select and interpret appropriate investigations, including imaging, based on a differential diagnosis                             |              |                 |            |          |
| Synthesize patient information to assess indications and risk of surgery                                                          |              |                 |            |          |
| Develop a plan for management which may include observation, surgical intervention and/or non-operative intervention              |              |                 |            |          |
| Obtain and document informed consent, explaining the risks and benefits of, and the rationale for a proposed procedure or therapy |              |                 |            |          |
| Recognize when strong emotions (such as anger, fear, anxiety, or sadness) are affecting an interaction and respond appropriately  |              |                 |            |          |
| Document the clinical encounter to adequately convey clinical reasoning and rationale for decisions and/or recommendations        |              |                 |            |          |

What level of supervision did the resident require?

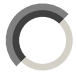

Observation only  
(no execution)

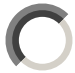

Direct, proactive  
supervision

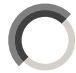

Indirect, reactive  
supervision

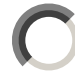

Independent  
performance (with  
remote supervision)

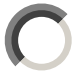

Supervision of  
trainees

Next Steps

Global Feedback

Concerns

|                                                                             | No                               | Yes                   |
|-----------------------------------------------------------------------------|----------------------------------|-----------------------|
| Do you have patient safety concerns related to this resident's performance? | <input checked="" type="radio"/> | <input type="radio"/> |
| Do you have professionalism concerns about this resident's performance?     | <input checked="" type="radio"/> | <input type="radio"/> |
| Are there other reasons to flag this assessment?                            | <input checked="" type="radio"/> | <input type="radio"/> |

Have feedback about this form? (eg, "Missing Dx", etc.)

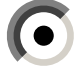

No

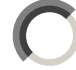

Yes
